# Supplementary material for: A General Analytical Model for Head Response to Oscillatory Pumping in Unconfined Aquifers: Consider the Effects of Delayed Gravity Drainage and Initial Condition
Source: Copernicus journal article supplement (doi:10.5194/hess-2018-482), 2018-11-01
Supplement: Supplementary file [file Revised manuscript.pdf › Revised manuscript.pdf]

# **A General Analytical Model for Head Response to Oscillatory Pumping in Unconfined Aquifers: Consider the Effects of Delayed Gravity Drainage and Initial Condition**

**Ching-Sheng Huang<sup>a</sup>, Ya-Hsin Tsai<sup>b</sup>, Hund-Der Yeh<sup>b\*</sup> and Tao Yang<sup>a\*</sup>**

<sup>a</sup> State Key Laboratory of Hydrology-Water Resources and Hydraulic Engineering, Center for Global Change and Water Cycle, Hohai University, Nanjing 210098, China

<sup>b</sup> Institute of Environmental Engineering, National Chiao Tung University, Hsinchu 300, Taiwan

\* Corresponding authors:

Hund-Der Yeh; E-mail: [hdych@mail.nctu.edu.tw](mailto:hdych@mail.nctu.edu.tw); Tel.: +886-3-5731910; fax: +886-3-5725958

Tao Yang; E-mail: [tao.yang@hhu.edu.cn](mailto:tao.yang@hhu.edu.cn); Tel.: +86-13770918075

Submission to *Hydrology and Earth System Sciences* on 11 September 2018

Re-submission to *Hydrology and Earth System Sciences* on 3 December 2018

## **Key points**

1. An analytical model of the hydraulic head due to oscillatory pumping in unconfined aquifers is presented.
2. Head fluctuations affected by instantaneous and delayed gravity drainages are discussed.
3. The effect of initial condition on the phase of head fluctuation is analyzed.
4. The present solution agrees well to head fluctuation data taken from a field oscillatory pumping.

## Abstract

Oscillatory pumping test (OPT) is an alternative to constant-head and constant-rate pumping tests for determining aquifer hydraulic parameters without net water extraction. There is a large number of analytical models presented for the analysis of OPT. The combined effects of delayed gravity drainage (DGD) and initial condition regarding the hydraulic head are commonly neglected in the existing models. This study aims to develop a new model for describing the hydraulic head fluctuation induced by OPT in an unconfined aquifer. The model contains a groundwater flow equation with the initial condition of static water table, Neumann boundary condition specified at the rim of a finite-radius well, and a free surface equation describing water table motion with the DGD effect. The solution of the model is derived by the Laplace transform, finite integral transform, and Weber transform. Sensitivity analysis is carried out for exploring head response to the change in each of hydraulic parameters. Results suggest the DGD reduces to instantaneous gravity drainage in predicting transient head fluctuation when dimensionless parameter  $a_1 = \varepsilon S_y b / K_z$  exceeds 500 with empirical constant  $\varepsilon$ , specific yield  $S_y$ , aquifer thickness  $b$ , and vertical hydraulic conductivity  $K_z$ . The water table can be regarded as a no-flow boundary when  $a_1 < 10^{-2}$ . A pseudo-steady state model without initial condition causes a certain time shift from the actual transient model in predicting simple harmonic motion of head fluctuation during a late pumping period. In addition, the present solution agrees well to head fluctuation data observed at the Savannah River site.

**KEYWORDS:** oscillatory pumping test, analytical solution, free surface equation, delayed gravity drainage, initial condition

## Notation and Abbreviation

|                        |                                                                                   |
|------------------------|-----------------------------------------------------------------------------------|
| $a$                    | $\sigma/\mu$                                                                      |
| $a_1, a_2$             | $\varepsilon S_y b/K_z, a_1 \mu/\sigma$                                           |
| $b$                    | Aquifer thickness                                                                 |
| DGD                    | Delayed gravity drainage                                                          |
| $h$                    | Hydraulic head                                                                    |
| $\bar{h}$              | Dimensionless Hydraulic head, i.e., $\bar{h} = (2\pi l K_r h)/ Q $                |
| IGD                    | Instantaneous gravity drainage                                                    |
| $K_r, K_z$             | Aquifer horizontal and vertical hydraulic conductivities, respectively            |
| LHS                    | Left-hand side                                                                    |
| $l$                    | Screen length, i.e., $z_u - z_l$                                                  |
| OPT                    | oscillatory pumping test                                                          |
| $P$                    | Period of oscillatory pumping rate                                                |
| PSS                    | Pseudo-steady state                                                               |
| $\bar{P}$              | Dimensionless period, i.e., $\bar{P} = (K_r P)/(S_s r_w^2)$                       |
| $p$                    | Laplace parameter                                                                 |
| $Q$                    | Amplitude of oscillatory pumping rate                                             |
| RHS                    | Right-hand side                                                                   |
| $r$                    | Radial distance from the center of pumping well                                   |
| $\bar{r}$              | Dimensionless radial distance, i.e., $\bar{r} = r/r_w$                            |
| $r_w$                  | Radius of pumping well                                                            |
| SHM                    | Simple harmonic motion                                                            |
| $S_s, S_y$             | Specific storage and specific yield, respectively                                 |
| $t$                    | Time since pumping                                                                |
| $\bar{t}$              | Dimensionless pumping time, i.e., $\bar{t} = (K_r t)/(S_s r_w^2)$                 |
| $z$                    | Elevation from aquifer bottom                                                     |
| $z_l, z_u$             | Lower and upper elevations of partial well screen, respectively                   |
| $\bar{z}$              | Dimensionless elevation, i.e., $\bar{z} = z/b$                                    |
| $\bar{z}_l, \bar{z}_u$ | $z_l/b, z_u/b$                                                                    |
| $\beta_n$              | Roots of Eq. (16)                                                                 |
| $\gamma$               | Dimensionless frequency of oscillatory pumping rate, i.e., $S_s r_w^2 \omega/K_r$ |
| $\varepsilon$          | Empirical constant associated with delayed gravity drainage                       |
| $\mu$                  | $K_z r_w^2/K_r b^2$                                                               |
| $\sigma$               | $S_y/(S_s b)$                                                                     |
| $\omega$               | Frequency of oscillatory pumping rate, i.e., $\omega = 2\pi/P$                    |

## 1. Introduction

Numerous attempts have been made by researchers to the study of oscillatory pumping test (OPT) that is an alternative to constant-rate and constant-head pumping tests for determining aquifer hydraulic parameters (e.g., Vine et al., 2016; Christensen et al., 2017; Watlet et al., 2018). The concept of OPT was first proposed by Kuo (1972) in the petroleum literature. The process of OPT contains extraction stages and injection stages. The pumping rate, in other words, varies periodically as a sinusoidal function of time. Compared with traditional constant-rate pumping, OPT in contaminated aquifers has the following advantages: (1) low cost because of no disposing contaminated water from the well, (2) reduced risk of treating contaminated fluid, (3) smaller contaminant movement, and (4) stable signal easily distinguished from background disturbance such as tide effect and varying river stage (e.g., Spane and Mackley, 2011). However, the disadvantages of OPT includes the need of an advanced apparatus producing periodic rate and the problem of signal attenuation in remote distance from the pumping well. Oscillatory hydraulic tomography adopts several oscillatory pumping wells with different frequencies (e.g., Yeh and Liu, 2000; Cardiff et al., 2013; Zhou et al., 2016; Muthuwatta, et al., 2017). Aquifer heterogeneity can be mapped by analyzing multiple data collected from observation wells. Cardiff and Barrash (2011) reviewed articles associated with hydraulic tomography and classified them according to nine categories in a table.

Various groups of researchers have worked with analytical and numerical models for OPT; each group has its own model and investigation. For example, Black and Kipp (1981) assumed the response of confined flow to OPT as simple harmonic motion (SHM) in the absence of initial condition. Cardiff and Barrash (2014) built an optimization formulation strategy using the Black and Kipp analytical solution. Dagan and Rabinovich (2014) also assumed hydraulic head fluctuation as SHM for OPT at a partially penetrating well in unconfined aquifers. Cardiff et al. (2013) characterized aquifer heterogeneity using the finite element-based COMSOL software that adopts SHM hydraulic head variation for OPT. On the other hand, Rasmussen et

al. (2003) found hydraulic head response tends to SHM after a certain period of pumping time when considering initial condition prior to OPT. Bakhos et al. (2014) used the Rasmussen et al. (2003) analytical solution to quantify the time after which hydraulic head fluctuation can be regarded as SHM since OPT began. As mentioned above, most of the models for OPT assume hydraulic head fluctuation as SHM without initial condition, and all of them treat the pumping well as a line source with infinitesimal radius.

Field applications of OPT for determining aquifer parameters have been conducted in recent years. Rasmussen et al. (2003) estimated aquifer hydraulic parameters based on 1- or 2-hour period of OPT at the Savannah River site. Maineult et al. (2008) observed spontaneous potential temporal variation in aquifer diffusivity at a study site in Bochum, Germany. Fokker et al. (2012; 2013) presented spatial distributions of aquifer transmission and storage coefficient derived from curve fitting based on a numerical model and field data from experiments at the southern city-limits of Bochum, Germany. Rabinovich et al. (2015) estimated aquifer parameters of equivalent hydraulic conductivity, specific storage and specific yield at the Boise Hydrogeophysical Research Site by curve fitting based on observation data and the Dagan and Rabinovich (2014) analytical solution. They conclude the equivalent hydraulic parameters can represent the actual aquifer heterogeneity of the study site.

Although a large number of studies have been made in developing analytical models for OPT, little is known about the combined effects of delayed gravity drainage (DGD), finite-radius pumping well, and initial condition prior to OPT. Analytical solution to such a question will not only have important physical implications but also shed light on OPT model development. This study builds an improved model describing hydraulic head fluctuation induced by OPT in an unconfined aquifer. The model is composed of a typical flow equation with the initial condition of static water table, an inner boundary condition specified at the rim of the pumping well for incorporating finite-radius effect, and a free surface equation describing the motion of water table with the DGD effect. The analytical solution of the model

is derived by the methods of Laplace transform, finite integral transform, and Weber transform. Based on the present solution, sensitivity analysis is performed to explore the hydraulic head in response to the change in each of hydraulic parameters. The effects of DGD and instantaneous gravity drainage (IGD) on the head fluctuations are compared. The quantitative criterion for treating the well radius as infinitesimal is discussed. The effect of the initial condition on the phase of head fluctuation is investigated. In addition, curve fitting of the present solution to head fluctuation data recorded at the Savannah River site is presented.

## 2. Methodology

### 2.1. Mathematical model

Consider an OPT in an unconfined aquifer illustrated in Fig. 1. The aquifer is of unbound lateral extent with a finite thickness  $b$ . The radial distance from the centerline of the well is  $r$ ; an elevation from the impermeable bottom of the aquifer is  $z$ . The well with outer radius  $r_w$  is screened from  $z_u$  to  $z_l$ .

The flow equation describing spatiotemporal head distribution in aquifers can be written as:

$$K_r \left( \frac{\partial^2 h}{\partial r^2} + \frac{1}{r} \frac{\partial h}{\partial r} \right) + K_z \frac{\partial^2 h}{\partial z^2} = S_s \frac{\partial h}{\partial t} \quad \text{for } r_w \leq r < \infty, 0 \leq z \leq b \text{ and } t \geq 0 \quad (1)$$

where  $h(r, z, t)$  is hydraulic head at location  $(r, z)$  and time  $t$ ;  $K_r$  and  $K_z$  are respectively the radial and vertical hydraulic conductivities;  $S_s$  is the specific storage. Consider water table as a reference datum where the elevation head is set to zero; the initial condition is expressed as:

$$h = 0 \text{ at } t = 0 \quad (2)$$

The rim of the wellbore is regarded as an inner boundary under the Neumann condition expressed as:

$$2\pi r_w K_r l \frac{\partial h}{\partial r} = \begin{cases} Q \sin(\omega t) & \text{for } z_l \leq z \leq z_u \\ 0 & \text{outside screen interval} \end{cases} \quad \text{at } r=r_w \quad (3)$$

where  $l = z_u - z_l$  is screen length;  $Q$  and  $\omega = 2\pi/P$  are respectively the amplitude and

frequency of oscillatory pumping rate (i.e.,  $Q\sin(\omega t)$ ) with a period  $P$ . Water table motion can be defined by Eq. (4a) for IGD (Neuman, 1972) and Eq. (4b) for DGD (Moench, 1995).

$$K_z \frac{\partial h}{\partial z} = -S_y \frac{\partial h}{\partial t} \quad \text{at } z = b \quad \text{for IGD} \quad (4a)$$

$$K_z \frac{\partial h}{\partial z} = -\varepsilon S_y \int_0^t \frac{\partial h}{\partial t'} \exp(-\varepsilon(t - t')) dt' \quad \text{at } z = b \quad \text{for DGD} \quad (4b)$$

where  $S_y$  is the specific yield;  $\varepsilon$  is an empirical constant. The impervious aquifer bottom is under the no-flow condition:

$$\frac{\partial h}{\partial z} = 0 \quad \text{at } z = 0 \quad (5)$$

The hydraulic head far away from the pumping well remains constant, written as

$$\lim_{r \rightarrow \infty} h(r, z, t) = 0 \quad (6)$$

Define dimensionless variables and parameters as follows:

$$\begin{aligned} \bar{h} &= \frac{2\pi l K_r}{Q} h, \quad \bar{r} = \frac{r}{r_w}, \quad \bar{z} = \frac{z}{b}, \quad \bar{z}_l = \frac{z_l}{b}, \quad \bar{z}_u = \frac{z_u}{b}, \quad \bar{t} = \frac{K_r}{S_s r_w^2} t, \quad \bar{P} = \frac{K_r}{S_s r_w^2} P \\ \gamma &= \frac{S_s r_w^2}{K_r} \omega, \quad \mu = \frac{K_z r_w^2}{K_r b^2}, \quad \sigma = \frac{S_y}{S_s b}, \quad a = \frac{\sigma}{\mu}, \quad a_1 = \frac{\varepsilon S_y b}{K_z}, \quad a_2 = \frac{a_1 \mu}{\sigma} \end{aligned} \quad (7)$$

where the overbar stands for a dimensionless symbol. Note that the magnitude of  $a_1$  is related to the DGD effect (Moench, 1995) and  $\gamma$  is a dimensionless frequency parameter. With Eq. (7), the dimensionless forms of Eqs. (1) - (6) become, respectively,

$$\frac{\partial^2 \bar{h}}{\partial \bar{r}^2} + \frac{1}{\bar{r}} \frac{\partial \bar{h}}{\partial \bar{r}} + \mu \frac{\partial^2 \bar{h}}{\partial \bar{z}^2} = \frac{\partial \bar{h}}{\partial \bar{t}} \quad \text{for } 1 \leq \bar{r} < \infty, \quad 0 \leq \bar{z} < 1 \quad \text{and } \bar{t} \geq 0 \quad (8)$$

$$\bar{h} = 0 \quad \text{at } \bar{t} = 0 \quad (9)$$

$$\frac{\partial \bar{h}}{\partial \bar{r}} = \begin{cases} \sin(\gamma \bar{t}) & \text{for } \bar{z}_l \leq \bar{z} \leq \bar{z}_u \\ 0 & \text{outside screen interval} \end{cases} \quad \text{at } \bar{r} = 1 \quad (10)$$

$$\frac{\partial \bar{h}}{\partial \bar{z}} = -a \frac{\partial \bar{h}}{\partial \bar{t}} \quad \text{at } \bar{z} = 1 \quad \text{for IGD} \quad (11a)$$

$$\frac{\partial \bar{h}}{\partial \bar{z}} = -a_1 \int_0^{\bar{t}} \frac{\partial \bar{h}}{\partial \bar{t}'} \exp(-a_2(\bar{t} - \bar{t}')) d\bar{t}' \quad \text{at } \bar{z} = 1 \quad \text{for DGD} \quad (12b)$$

$$\frac{\partial \bar{h}}{\partial \bar{z}} = 0 \quad \text{at } \bar{z} = 0 \quad (13)$$

$$\lim_{\bar{r} \rightarrow \infty} \bar{h}(\bar{r}, \bar{z}, \bar{t}) = 0 \quad (14)$$

Eqs. (8) – (13) represent the transient DGD model when excluding (11a) and transient IGD

146 model when excluding (11b).

## 147 **2.2. Transient solution for unconfined aquifer**

148 The Laplace transform and finite integral transform are applied to solve Eqs. (8) - (13)  
 149 (Latinopoulos, 1985; Liang et al., 2017; 2018). The transient solution can then be expressed as

$$150 \bar{h}(\bar{r}, \bar{z}, \bar{t}) = \bar{h}_{\text{exp}}(\bar{r}, \bar{z}, \bar{t}) + \bar{h}_{\text{SHM}}(\bar{r}, \bar{z}, \bar{t}) \quad (15a)$$

151 with

$$152 \bar{h}_{\text{exp}}(\bar{r}, \bar{z}, \bar{t}) = \frac{-2\gamma}{\pi} \sum_{n=1}^{\infty} \int_0^{\infty} \cos(\beta_n \bar{z}) \exp(p_0 \bar{t}) \text{Im}(\varepsilon_1 \varepsilon_2) d\zeta \quad (15b)$$

$$153 \bar{h}_{\text{SHM}}(\bar{r}, \bar{z}, \bar{t}) = \bar{A}_t(\bar{r}, \bar{z}) \cos(\gamma \bar{t} - \phi_t(\bar{r}, \bar{z})) \quad (15c)$$

$$154 \bar{A}_t(\bar{r}, \bar{z}) = \sqrt{a_t(\bar{r}, \bar{z})^2 + b_t(\bar{r}, \bar{z})^2} \quad (15d)$$

$$155 a_t(\bar{r}, \bar{z}) = \frac{2}{\pi} \sum_{n=1}^{\infty} \int_0^{\infty} p_0 \cos(\beta_n \bar{z}) \text{Im}(\varepsilon_1 \varepsilon_2) d\zeta \quad (15e)$$

$$156 b_t(\bar{r}, \bar{z}) = \frac{2\gamma}{\pi} \sum_{n=1}^{\infty} \int_0^{\infty} \cos(\beta_n \bar{z}) \text{Im}(\varepsilon_1 \varepsilon_2) d\zeta \quad (15f)$$

$$157 \phi_t(\bar{r}, \bar{z}) = \cos^{-1}(b_t(\bar{r}, \bar{z})/\bar{A}_t(\bar{r}, \bar{z})) \quad (15g)$$

$$158 \varepsilon_1 = K_0(\lambda_0 \bar{r})(\sin(\bar{z}_u \beta_n) - \sin(\bar{z}_l \beta_n))/(\beta_n \lambda_0 K_1(\lambda_0)(p_0^2 + \gamma^2)) \quad (15h)$$

$$159 \varepsilon_2 = (\beta_n^2 + c_0^2)/(\beta_n^2 + c_0^2 + c_0) \quad (15i)$$

$$160 p_0 = -\zeta - \mu \beta_n^2 \quad (15j)$$

$$161 \lambda_0 = \sqrt{\zeta} i \quad (15k)$$

162 where  $c_0 = ap_0$  for IGD and  $a_1 p_0/(p_0 + a_2)$  for DGD,  $i$  is the imaginary unit,  $\text{Im}(-)$  is the  
 163 imaginary part of a complex number,  $K_0(-)$  and  $K_1(-)$  are the modified Bessel functions  
 164 of the second kind of order zero and one, respectively, and  $\beta_n$  is the positive roots of the  
 165 equation:

$$166 \tan \beta_n = c_0/\beta_n \quad (16)$$

167 The method to find the roots of  $\beta_n$  is discussed in section 2.3. The detailed derivation of Eqs.  
 168 (15a)–(15k) is presented in the supporting material. The first term on the right-hand side (RHS)  
 169 of Eq. (15a) exhibits exponential decay due to the initial condition since pumping began; the  
 170 second term defines SHM with amplitude  $\bar{A}_t(\bar{r}, \bar{z})$  and phase shift  $\phi_t(\bar{r}, \bar{z})$  at a given point



( $\bar{r}, \bar{z}$ ). The numerical results of the integrals in Eqs. (15b), (15e) and (15f) are obtained by the Mathematica NIntegrate function.

### 2.3. Calculation of $\beta_n$

The eigenvalues  $\beta_1, \dots, \beta_n$ , the roots of Eq. (16) with  $c = c_0$ , can be determined by applying the Mathematica function FindRoot based on Newton's method with reasonable initial guesses. The roots are located at the intersection of the curves plotted by the RHS and left-hand side (LHS) functions of  $\beta_n$  in Eq. (16). The roots are very close to the vertical asymptotes of the periodical tangent function  $\tan \beta_n$ . When  $c_0 = ap_0$ , the initial guess for each  $\beta_n$  can be considered as  $\beta_{0,n} + \delta$  where  $\beta_{0,n} = (2n - 1)\pi/2$ ,  $n \in (1, 2, \dots, \infty)$  and  $\delta$  is a small positive value set to  $10^{-10}$  to prevent the denominator in Eq. (16) from zero. When  $c_0 = a_1 p_0 / (p_0 + a_2)$ , the initial guess is set to  $\beta_{0,n} - \delta$  for  $a_2 - \zeta \leq 0$ . There is an additional vertical asymptote at  $\beta_n = \sqrt{(a_2 - \zeta)/\mu}$  derived from the RHS function of Eq. (16) if  $a_2 - \zeta > 0$ . The initial guess is therefore set to  $\beta_{0,n} + \delta$  for  $\beta_{0,n}$  on the LHS of the asymptote and  $\beta_{0,n} - \delta$  for  $\beta_{0,n}$  on the RHS.

### 2.4. Transient solution for confined aquifer

When  $S_y = 0$  (i.e.,  $a = 0$  or  $a_1 = 0$ ), Eq. (11a) or (11b) reduces to  $\partial \bar{h} / \partial \bar{z} = 0$  for no-flow condition at the top of the aquifer, indicating the unconfined aquifer becomes a confined one. Under this condition, Eq. (16) becomes  $\tan \beta_n = 0$  with roots  $\beta_n = 0, \pi, 2\pi, \dots, n\pi, \dots, \infty$ ; Eq. (15i) reduces to  $\varepsilon_2 = 1$ ; factor 2 in Eqs. (15b), (15e) and (15f) is replaced by unity for  $\beta_n = 0$  and remains for the others. The analytical solution of the transient head for the confined aquifer can be expressed as Eqs. (15a) - (15k) with

$$\bar{h}_{\text{exp}}(\bar{r}, \bar{z}, \bar{t}) = \frac{-\gamma}{\pi} \int_0^\infty \text{Im}(\varepsilon_0) \exp(-\zeta \bar{t}) d\zeta - \frac{2\gamma}{\pi} \sum_{n=1}^\infty \int_0^\infty \cos(n\pi \bar{z}) \text{Im}(\varepsilon_1) \exp(p_0 \bar{t}) d\zeta \quad (17a)$$

$$a_t(\bar{r}, \bar{z}) = -\frac{1}{\pi} \int_0^\infty \zeta \text{Im}(\varepsilon_0) d\zeta + \frac{2}{\pi} \sum_{n=1}^\infty \int_0^\infty p_0 \cos(n\pi \bar{z}) \text{Im}(\varepsilon_1) d\zeta \quad (17b)$$

$$b_t(\bar{r}, \bar{z}) = \frac{\gamma}{\pi} \int_0^\infty \text{Im}(\varepsilon_0) d\zeta + \frac{2\gamma}{\pi} \sum_{n=1}^\infty \int_0^\infty \cos(n\pi\bar{z}) \text{Im}(\varepsilon_1) d\zeta \quad (17c)$$

$$\varepsilon_0 = (\bar{z}_u - \bar{z}_l) K_0(\lambda_0 \bar{r}) / (\lambda_0 K_1(\lambda_0) (\zeta^2 + \gamma^2)) \quad (17d)$$

Note that Eq. (15h) reduces to Eq. (17d) based on  $\beta_n = 0$  and L' Hospital's rule. When  $\bar{z}_u = 1$  and  $\bar{z}_l = 0$  for the case of full screen, Eq. (15h) gives  $\varepsilon_1 = 0$  for  $\beta_n > 0$  and the second RHS terms of Eqs. (17a) – (17c) can therefore be eliminated. This causes the solution for confined aquifers is independent of dimensionless elevation  $\bar{z}$ , indicating only horizontal flow in the aquifer.

## 2.5. Pseudo-steady state solution for unconfined aquifer

A pseudo-steady state (PSS) solution  $\bar{h}_s$  accounts for SHM of head fluctuation after a certain period of pumping time and satisfies the following form (Dagan and Rabinovich, 2014)

$$\bar{h}_s(\bar{r}, \bar{z}, \bar{t}) = \text{Im}(\bar{H}(\bar{r}, \bar{z}) e^{i\gamma\bar{t}}) \quad (18)$$

where  $\bar{H}(\bar{r}, \bar{z})$  is a space function of  $\bar{r}$  and  $\bar{z}$ . Define a PSS IGD model as Eqs. (8) - (13) excluding (9), (11b) and replacing  $\sin(\gamma\bar{t})$  in (10) by  $e^{i\gamma\bar{t}}$ . Substituting Eq. (18) and  $\partial\bar{h}_s/\partial\bar{t} = \text{Im}(i\gamma\bar{H}(\bar{r}, \bar{z}) e^{i\gamma\bar{t}})$  into the model results in

$$\frac{\partial^2 \bar{H}}{\partial \bar{r}^2} + \frac{1}{\bar{r}} \frac{\partial \bar{H}}{\partial \bar{r}} + \mu \frac{\partial^2 \bar{H}}{\partial \bar{z}^2} = i\gamma \bar{H} \quad (19)$$

$$\frac{\partial \bar{H}}{\partial \bar{r}} = \begin{cases} 1 & \text{for } \bar{z}_l \leq \bar{z} \leq \bar{z}_u \\ 0 & \text{outside screen interval} \end{cases} \text{ at } \bar{r} = 1 \quad (20)$$

$$\frac{\partial \bar{H}}{\partial \bar{z}} = -i\alpha\gamma \bar{H} \text{ at } \bar{z} = 1 \text{ for IGD} \quad (21)$$

$$\frac{\partial \bar{H}}{\partial \bar{z}} = 0 \text{ at } \bar{z} = 0 \quad (22)$$

$$\lim_{\bar{r} \rightarrow \infty} \bar{H} = 0 \quad (23)$$

The resultant model is independent of  $\bar{t}$ , indicating the analytical solution of  $\bar{H}(\bar{r}, \bar{z})$  is tractable. Similarly, consider a PSS DGD model that equals the PSS IGD model but replaces (11a) by (11b). Substituting Eq. (18) into the result yields a model that depends on  $\bar{t}$ , indicating the solution  $\bar{h}_s$  to the PSS DGD model is not tractable.

The Weber transform, defined in Eq. (B.1) of the supporting material, may be considered

219 as a Hankel transform with a more general kernel function. It can be applied to diffusion-type  
 220 problems with a radial-symmetric region from a finite distance to infinity. For groundwater  
 221 flow problems, it can be used to develop the analytical solution for the flow equation with a  
 222 boundary condition of Dirichlet, Neumann, or Robin type specified at the rim of a finite-radius  
 223 well (e.g., Lin and Yeh, 2017; Povstenko, 2015). Taking the transform and the formula of  
 224  $e^{i\gamma\bar{t}} = \cos(\gamma\bar{t}) + i \sin(\gamma\bar{t})$  to solve Eqs. (18) - (23) yields the solution of  $\bar{h}_s$  expressed as

$$225 \quad \bar{h}_s(\bar{r}, \bar{z}, \bar{t}) = \bar{A}_s(\bar{r}, \bar{z}) \cos(\gamma\bar{t} - \phi_s(\bar{r}, \bar{z})) \quad (24a)$$

$$226 \quad \bar{A}_s(\bar{r}, \bar{z}) = \sqrt{a_s(\bar{r}, \bar{z})^2 + b_s(\bar{r}, \bar{z})^2} \quad (24b)$$

$$227 \quad a_s(\bar{r}, \bar{z}) = \text{Re}(\bar{H}(\bar{r}, \bar{z})) \quad (24c)$$

$$228 \quad b_s(\bar{r}, \bar{z}) = \text{Im}(\bar{H}(\bar{r}, \bar{z})) \quad (24d)$$

$$229 \quad \phi_s(\bar{r}, \bar{z}) = \cos^{-1}(b_s(\bar{r}, \bar{z})/A_s(\bar{r}, \bar{z})) \quad (24e)$$

$$230 \quad \bar{H}(\bar{r}, \bar{z}) = \begin{cases} \int_0^\infty \tilde{H}_u \xi \Omega d\xi & \text{for } \bar{z}_u < \bar{z} \leq 1 \\ \int_0^\infty \tilde{H}_m \xi \Omega d\xi & \text{for } \bar{z}_l \leq \bar{z} \leq \bar{z}_u \\ \int_0^\infty \tilde{H}_l \xi \Omega d\xi & \text{for } 0 \leq \bar{z} < \bar{z}_l \end{cases} \quad (24f)$$

$$231 \quad \Omega = (J_0(\xi\bar{r})Y_1(\xi) - Y_0(\xi\bar{r})J_1(\xi))/(J_1^2(\xi) + Y_1^2(\xi)) \quad (24g)$$

232 with the Bessel functions of the first kind of order zero  $J_0(-)$  and one  $J_1(-)$  as well as the  
 233 second kind of order zero  $Y_0(-)$  and  $Y_1(-)$ ,

$$234 \quad \begin{cases} \tilde{H}_u = \tilde{H}_p(c_1 \exp(\lambda_w \bar{z}) + c_2 \exp(-\lambda_w \bar{z})) & \text{for } \bar{z}_u < \bar{z} \leq 1 \\ \tilde{H}_m = \tilde{H}_p(c_3 \exp(\lambda_w \bar{z}) + c_4 \exp(-\lambda_w \bar{z}) - 1) & \text{for } \bar{z}_l \leq \bar{z} \leq \bar{z}_u \\ \tilde{H}_l = \tilde{H}_p c_5 (\exp(\lambda_w \bar{z}) + \exp(-\lambda_w \bar{z})) & \text{for } 0 \leq \bar{z} < \bar{z}_l \end{cases} \quad (24h)$$

$$235 \quad c_1 = -e^{-\lambda_w}(\lambda_w - \alpha)(\sinh(\bar{z}_l \lambda_w) - \sinh(\bar{z}_u \lambda_w))/D \quad (24i)$$

$$236 \quad c_2 = -e^{\lambda_w}(\lambda_w + \alpha)(\sinh(\bar{z}_l \lambda_w) - \sinh(\bar{z}_u \lambda_w))/D \quad (24j)$$

$$237 \quad c_3 = \frac{e^{-(1+\bar{z}_l+\bar{z}_u)\lambda_w}}{2D} \left( \alpha(e^{(2+\bar{z}_l)\lambda_w} + e^{\bar{z}_u \lambda_w} - e^{(2\bar{z}_l+\bar{z}_u)\lambda_w}) + (\alpha - \lambda_w)e^{(\bar{z}_l+2\bar{z}_u)\lambda_w} + \right.$$

$$238 \quad \left. \lambda_w(e^{(2+\bar{z}_l)\lambda_w} - e^{\bar{z}_u \lambda_w} + e^{(2\bar{z}_l+\bar{z}_u)\lambda_w}) \right) \quad (24k)$$

$$239 \quad c_4 = \frac{e^{-(1+\bar{z}_l+\bar{z}_u)\lambda_w}}{2D} \left( (\alpha - \lambda_w)e^{(\bar{z}_l+2\bar{z}_u)\lambda_w} + (\alpha + \lambda_w)(e^{(2+\bar{z}_l)\lambda_w} - e^{(2+\bar{z}_u)\lambda_w} + \right.$$

$$e^{(2+2\bar{z}_l+\bar{z}_u)\lambda_w}) \quad (24l)$$

$$c_5 = \frac{1}{2} e^{-(1+\bar{z}_l+\bar{z}_u)\lambda_w} (e^{\bar{z}_l\lambda_w} - e^{\bar{z}_u\lambda_w}) ((\lambda_w - \alpha)e^{(\bar{z}_l+\bar{z}_u)\lambda_w} + (\lambda_w + \alpha)e^{2\lambda_w}) \quad (24m)$$

where  $\lambda_w^2 = (\xi^2 + i\gamma)/\mu$ ,  $\alpha = i\gamma a$ ,  $\tilde{H}_p = 2/(\pi\mu\xi\lambda_w^2)$  and  $D = 2(\alpha \cosh \lambda_w + \lambda_w \sinh \lambda_w)$ , and  $\text{Re}(-)$  is the real part of a complex number. Again, one can refer to the supporting material for the derivation of the solution. Eq. (24a) indicates SHM for the response of the hydraulic head at any point to oscillatory pumping. Note that Eq. (24f) reduces to  $\bar{H}(\bar{r}, \bar{z}) = \int_0^\infty \tilde{H}_m \xi \Omega d\xi$  for a fully screened well when  $\bar{z}_l = 0$  and  $\bar{z}_u = 1$ .

## 2.6. Pseudo-steady state solution for confined aquifers

Applying the finite Fourier cosine transform to the model, Eqs. (19) – (23) with  $S_y = 0$  (i.e.,  $a = 0$ ) for the confined condition, leads to an ordinary differential equation with two boundary conditions. With solving the boundary-value problem, the solution of  $\bar{h}_s$  for confined aquifers can be expressed as Eqs. (24a) - (24e) with  $\bar{H}(\bar{r}, \bar{z})$  defined as

$$\bar{H}(\bar{r}, \bar{z}) = -2 \sum_{m=0}^{\infty} \frac{K_0(\bar{r}\lambda_m)}{\lambda_m K_1(\lambda_m)} \times \begin{cases} 0.5(\bar{z}_u - \bar{z}_l) & \text{for } m = 0 \\ \frac{\cos(m\pi\bar{z})}{m\pi} (\sin(\bar{z}_u m\pi) - \sin(\bar{z}_l m\pi)) & \text{for } m > 0 \end{cases} \quad (25)$$

where  $\lambda_m^2 = \gamma i + \mu(m\pi)^2$ . The derivation of Eq. (25) is also listed in the supporting material. For a fully screened well (i.e.,  $\bar{z}_u = 1$ ,  $\bar{z}_l = 0$ ), the first term of the series (i.e.,  $m = 0$ ) remains and the others equal zero because of  $\sin(\bar{z}_u m\pi) - \sin(\bar{z}_l m\pi) = 0$ . The result is independent of dimensionless elevation  $\bar{z}$ , indicating the confined flow is only horizontal.

## 2.7. Special cases of the present solution

Table 1 classifies the present solution (i.e., solution 1) and its special cases (i.e., solutions 2 to 6) according to transient or PSS flow, unconfined or confined aquifer, and IGD or DGD. Each of solutions 1 to 6 reduces to a special case for fully screened well. Existing analytical solutions can be regarded as special cases of the present solution as discussed in section 3.4 (e.g., Black and Kipp, 1981; Rasmussen et al., 2003; Dagan and Rabinovich, 2014).

## 2.8. Sensitivity analysis

264 Sensitivity analysis evaluates hydraulic head variation in response to the change in each of  $K_r$ ,  
 265  $K_z$ ,  $S_s$ ,  $S_y$ ,  $\omega$ , and  $\varepsilon$ . The normalized sensitivity coefficient can be defined as (Liou and Yeh,  
 266 1997)

$$267 \quad S_i = P_i \frac{\partial X}{\partial P_i} \quad (26)$$

268 where  $S_i$  is the sensitivity coefficient of  $i$ th parameter;  $P_i$  is the magnitude of the  $i$ th input  
 269 parameter;  $X$  represents the present solution in dimensional form. Eq. (26) can be approximated  
 270 as

$$271 \quad S_i = P_i \frac{X(P_i + \Delta P_i) - X(P_i)}{\Delta P_i} \quad (27)$$

272 where  $\Delta P_i$ , a small increment, is chosen as  $10^{-3}P_i$ .

### 273 **3. Results and Discussion**

274 The following sections demonstrate the response of the hydraulic head to oscillatory pumping  
 275 using the present solution. The default values in calculation are  $r = 0.05$  m,  $z = 5$  m,  $t = 0$ ,  $b =$   
 276  $10$  m,  $Q = 10^{-3}$  m<sup>3</sup>/s,  $r_w = 0.05$  m,  $z_u = 5.5$  m,  $z_l = 4.5$  m,  $K_r = 10^{-4}$  m/s,  $K_z = 10^{-5}$  m/s,  $S_s = 10^{-5}$   
 277 m<sup>-1</sup>,  $S_y = 10^{-4}$ ,  $\omega = 2\pi/30$  s<sup>-1</sup>, and  $\varepsilon = 10^{-2}$  s<sup>-1</sup>. The corresponding dimensionless parameters  
 278 and variables are  $\bar{r} = 1$ ,  $\bar{z} = 0.5$ ,  $\bar{t} = 0$ ,  $\bar{z}_u = 0.55$ ,  $\bar{z}_l = 0.45$ ,  $\gamma = 5.24 \times 10^{-5}$ ,  $\mu =$   
 279  $2.5 \times 10^{-6}$ ,  $a = 4 \times 10^5$ ,  $a_1 = 1$  and  $a_2 = 2.5 \times 10^{-6}$ .

#### 280 **3.1. Delayed gravity drainage**

281 Previous analytical models for OPT consider either confined flow (e.g., Rasmussen et al., 2003)  
 282 or unconfined flow with IGD effect (e.g., Dagan and Rabinovich, 2014). Little attention has  
 283 been given to the DGD effect. This section examines the relation between these three kinds of  
 284 models. Figure 2 shows the curve of the dimensionless amplitude  $\bar{A}_t$  at  $(\bar{r}, \bar{z}) = (1, 1)$  of  
 285 solution 1 versus the dimensionless parameter  $a_1$  related to the effect. The transient head  
 286 fluctuations are plotted by solution 1 with  $a_1 = 10^{-2}$ , 1, 10, 500, solution 2 for IGD and  
 287 solution 3 for confined flow. When  $10^{-2} \leq a_1 \leq 500$ , the  $\bar{A}_t$  gradually decreases with  $a_1$   
 288 to the trough and then increases to the ultimate value of  $\bar{A}_t = 1.79 \times 10^{-2}$ . The DGD, in other

words, causes an effect. When  $\alpha_1 \leq 10^{-2}$ , solutions 1 and 3 agree on the predicted heads, indicating the unconfined aquifer with the DGD effect behaves like confined aquifer and the water table can be regarded as a no-flow boundary. When  $\alpha_1 \geq 500$ , the head fluctuations predicted by solutions 1 and 2 are identical, indicating the DGD effect can be ignored and Eq. (4b) reduces to (4a) for the IGD condition.

### 3.2. Effect of finite radius of pumping well

Existing analytical models for OPT mostly treated the pumping well as a line source with infinitesimal radius (e.g., Rasmussen et al., 2003; Dagan and Rabinovich, 2014). The finite difference scheme for the model also treats the well as a nodal point by neglecting the radius. These will lead to significant error when a well has the radius ranging from 0.5 m to 2 m (Yeh and Chang, 2013). This section discusses the relative error in predicted amplitude defined as

$$RE = |\bar{A}_{D\&R} - \bar{A}_t| / \bar{A}_t \quad (28)$$

where  $\bar{A}_{D\&R}$  and  $\bar{A}_t$  are the dimensionless amplitudes at  $\bar{r} = 1$  (i.e.,  $r = r_w$ ) predicted by the Dagan and Rabinovich (2014) solution and the IGD solution 2. Note that their solution assumes infinitesimal radius of a pumping well and has a typo that the term  $e^{-D_w+1} - e^{-D_w}$  should read  $e^{\beta(-D_w+1)} - e^{-\beta D_w}$  (see their Eq. (25)). Figure 3 demonstrates the RE for different values of radius  $r_w$ . The RE increases with  $r_w$  as expected. For case 1 of  $r_w = 0.1$  m, both solutions agree well in the entire domain of  $1 \leq \bar{r} \leq \infty$ , indicating a pumping well with  $r_w \leq 0.1$  m can be regarded as a line source. For the extreme case 2 of  $r_w = 1$  m or case 3 of  $r_w = 2$  m, the Dagan and Rabinovich solution underestimates the dimensionless amplitude for  $1 \leq \bar{r} \leq 6$  and agrees to the present solution for  $\bar{r} > 6$ . The REs for these two cases exceed 10%. The effect of finite radius should therefore be considered in OPT models especially when observed hydraulic head data are taken close to the wellbore of a large-diameter well.

### 3.3. Sensitivity analysis

The temporal distributions of normalized sensitivity coefficient  $S_i$  defined as Eq. (27) with  $X = h_{\text{exp}}$  of solution 1 are displayed in Fig. 4a for the response of exponential decay to the

change in each of six parameters  $K_r$ ,  $K_z$ ,  $S_s$ ,  $S_y$ ,  $\omega$  and  $\varepsilon$ . The exponential decay is very sensitive to variation in each of  $K_r$ ,  $K_z$ ,  $S_s$  and  $\omega$  because of  $|S_i| > 0$ . Precisely, a positive perturbation in  $S_s$  produces an increase in the magnitude of  $h_{\text{exp}}$  while that in  $K_r$  or  $K_z$  causes a decrease. In addition, a positive perturbation in  $\omega$  yields an increase in  $h_{\text{exp}}$  before  $t = 1$  s and a decrease after that time. It is worth noting that  $S_i$  for  $S_y$  or  $\varepsilon$  is very close to zero over the entire period of time, indicating  $h_{\text{exp}}$  is insensitive to the change in  $S_y$  or  $\varepsilon$  and the subtle change of gravity drainage has no influence on the exponential decay. On the other hand, the spatial distributions of  $S_i$  associated with the amplitude  $A_t$  are shown in Fig. 4b in response to the changes in those six parameters. The  $A_t$  is again sensitive to the change in each of  $K_r$ ,  $K_z$ ,  $S_s$  and  $\omega$  but insensitive to the change in  $S_y$  or  $\varepsilon$ . The same result of  $|S_i| \cong 0$  for  $S_y$  or  $\varepsilon$  applies to any observation point under the water table (i.e.,  $\bar{z} < 1$ ), but  $|S_i| > 0$  at the water table (i.e.,  $\bar{z} = 1$ ) shown in Fig. 4c. From those discussed above, we may conclude the changes in the four key parameters  $K_r$ ,  $K_z$ ,  $S_s$  and  $\omega$  significantly affect head prediction in the entire aquifer domain. The change in  $S_y$  or  $\varepsilon$  leads to insignificant variation in the predicted head below the water table and slight variation at the water table.

#### 3.4. Transient head fluctuation affected by the initial condition

Figure 5 demonstrates head fluctuations predicted by DGD solution 1 and IGD solution 2 expressed as  $\bar{h} = \bar{h}_{\text{exp}} + \bar{h}_{\text{SHM}}$  for transient flow and by IGD solution as  $\bar{h}_s = \bar{A}_s \cos(\gamma t - \phi_s)$  for PSS flow. The transient head fluctuation starts from  $\bar{h} = 0$  at  $\bar{t} = 0$  and approaches SHM predicted by  $\bar{h}_{\text{SHM}}$  when  $\bar{h}_{\text{exp}} \cong 0$  m after  $\bar{t} = 0.5\bar{P}$  (i.e.,  $6 \times 10^4$ ). Solutions 1 and 2 agree to the  $\bar{h}$  predictions because the head at  $\bar{z} = 0.5$  under the water table is insensitive to the change in  $S_y$  or  $\varepsilon$  as discussed in section 3.3. It is worth noting that the solution of Dagan and Rabinovich (2014) for PSS flow has a certain time shift from the  $\bar{h}_{\text{SHM}}$  of solution 2. This indicates the phase of their solution (i.e., 1.50 rad) should be replaced by the phase of solution 2 (i.e.,  $\phi_t = 1.64$  rad) so that their solution exactly fits the  $\bar{h}_{\text{SHM}}$  of solution 2.

Figure 6 displays head fluctuations predicted by transient solution 3 expressed as  $\bar{h} = \bar{h}_{\text{exp}} + \bar{h}_{\text{SHM}}$  and PSS solution 6 as  $\bar{h}_s = \bar{A}_s \cos(\gamma t - \phi_s)$  for partially-screened pumping well in panel (a) and full screen in panel (b). The Rasmussen et al. (2003) solution for transient flow predicts the same  $\bar{h}$  as solution 3. The Black and Kipp (1981) for PPS flow also predict close  $\bar{h}_{\text{SHM}}$  predictions of solution 3. The phase of solution 6 (i.e.,  $\phi_s = 1.50$  rad for panel (a) and 1.33 rad for (b)) should also be replaced by the phase of solution 3 (i.e.,  $\phi_t = 1.64$  rad for (a) and 1.81 rad for (b)) so that both solutions 3 and 6 agree to the SHM of head fluctuation. As concluded, excluding the initial condition with Eq. (18) for a PSS model leads to a certain time shift from the SHM of the head fluctuation predicted by the associated transient model while the transient and PSS models give the same SHM amplitude.

### 3.5. Application of the present solution to field experiment

Rasmussen et al. (2003) conducted field OPTs in a three-layered aquifer system containing one Surficial Aquifer, the Barnwell-McBean Aquifer in between and the deepest Gordon Aquifer at the Savannah River site. Two clay layers dividing these three aquifers may be regarded as impervious strata. For the OPT at the Surficial Aquifer, the formation has 6.25 m averaged thickness near the test site. The fully-screened pumping well has 7.6 cm outer radius. The pumping rate can be approximated as  $Q\sin(\omega t)$  with  $Q = 4.16 \times 10^{-4} \text{ m}^3/\text{s}$  and  $\omega = 2\pi \text{ h}^{-1}$ . The distance from the pumping well is 6 m to the observation well 101D and 11.5 m to well 102D. The screen lengths are 3 m from the aquifer bottom for well 101D and from the water table for well 102D. For the OPT at the Barnwell-McBean Aquifer, the formation mainly consists of sand and fine-grained material. The pumping well has outer radius of 7.6 cm and pumping rate of  $Q\sin(\omega t)$  with  $Q = 1.19 \times 10^{-3} \text{ m}^3/\text{s}$  and  $\omega = \pi \text{ h}^{-1}$ . The observation well 201C is at 6 m from the pumping well. The data of time-varying hydraulic heads at the observation wells (i.e., 101D, 102D, 201C) are plotted in Fig. 7. One can refer to Rasmussen et al. (2003) for detailed description of the Savannah River site.

The aquifer hydraulic parameters are determined based on solutions 3 to 6 coupled with



the Levenberg–Marquardt algorithm provided in the Mathematica function FindFit (Wolfram, 1991). Solutions 4 and 5 are used to predict depth-averaged head expressed as  $(z'_u - z'_l)^{-1} \int_{z'_l}^{z'_u} h_s dz$  with the upper elevation  $z'_u$  and lower one  $z'_l$  of the finite screen of the observation well 101D or 102D at the Surficial Aquifer. Note that solutions 3 and 6 are independent of elevation because of the fully-screened pumping well. Define the standard error of estimate (SEE) as  $SEE = \sqrt{\frac{1}{M} \sum_{j=1}^M e_j^2}$  and the mean error (ME) as  $ME = \frac{1}{M} \sum_{j=1}^M e_j$  where  $e_j$  is the difference between predicted and observed hydraulic heads and  $M$  is the number of observation data (Yeh, 1987). The estimated parameters and associated SEE and ME are displayed in Table 2. The result shows the estimated  $S_y$  is very small, and the estimated  $T$  and  $S$  by solution 3 or 6 for confined flow are close to those by solution 4 or 5 for unconfined flow, indicating that the unconfined flow induced by the OPT in the Surficial Aquifer is negligibly small. Little gravity drainage due to the DGD effect appears with  $a_1 = 20$  for wells 101D and 102D as discussed in section 3.1. Rasmussen et al. (2003) also revealed the confined behaviour of the OPT-induced flow in the Surficial Aquifer. The estimated  $S_y$  is one order less than the lower limit of the typical range of  $0.01 \sim 0.3$  (Freeze and Cherry, 1979), which accords with the findings of Rasmussen et al. (2003) and Rabinovich et al. (2015). Such a fact might be attributed to the problem of the moisture exchange limited by capillary fringe between the zones below and upper the water table. Several laboratory researches have confirmed an estimate of  $S_y$  at short period of OPT is much smaller than that determined by constant-rate pumping test (e.g., Cartwright et al., 2003; 2005). On the other hand, transient solution 3 gives smaller SEEs than PSS solution 6 for the Barnwell-McBean Aquifer and better fits to the observed data at the early pumping periods as shown in Fig. 7. From those discussed above, we may conclude the present solution is applicable to real-world OPT.

#### 4. Concluding remarks

A variety of analytical models for OPT have been proposed so far, but little attention is paid to

the joint effects of DGD, initial condition, and finite radius of a pumping well. This study develops a new model for describing hydraulic head fluctuation due to OPT in unconfined aquifers. Static hydraulic head prior to OPT is regarded as an initial condition. A Neumann boundary condition is specified at the rim of a finite-radius pumping well. A free surface equation accounting for the DGD effect is considered as the top boundary condition. The solution of the model is derived by the Laplace transform, finite integral transform and Weber transform. The sensitivity analysis of the head response to the change in each of hydraulic parameters is performed. The observation data obtained from the OPT at the Savannah River site are analyzed by the present solution when coupling the Levenberg–Marquardt algorithm to estimate aquifer hydraulic parameters. Our findings are summarized below:

1. When  $10^{-2} \leq a_1 \leq 500$ , the effect of DGD on the head fluctuation should be considered. The amplitude of head fluctuation predicted by DGD solution 1 decreases with increasing  $a_1$  to a certain trough and then increases to the amplitude predicted by IGD solution 2. When  $a_1 > 500$ , the DGD becomes IGD. Both solutions 1 and 2 predict the same head fluctuation. When  $a_1 < 10^{-2}$ , the DGD results in the water table under no-flow condition. Solution 1 for unconfined flow gives an identical head prediction to solution 3 for confined flow.
2. Assuming a large-diameter well as a line source with infinitesimal radius underestimates the amplitude of head fluctuation in the domain of  $1 \leq \bar{r} \leq 6$  when the radius exceeds 80 cm, leading to relative error  $RE > 10\%$  shown in Fig. 3. In contrast, the assumption is valid in predicting the amplitude in the domain of  $\bar{r} > 6$  in spite of adopting a large-diameter well. When  $r_w \leq 10$  cm (i.e.,  $RE < 0.45\%$ ), the well radius can be regarded as infinitesimal. The result is applicable to existing analytical solutions assuming infinitesimal radius and finite difference solutions treating the pumping well as a nodal point.
3. The sensitivity analysis suggests the changes in four parameters  $K_r$ ,  $K_z$ ,  $S_s$  and  $\omega$  significantly affect head prediction in the entire aquifer domain. The change in  $S_y$  or  $\varepsilon$

causes insignificant variation in the head under water table but slight variation at the water table.

4. Analytical solutions for OPT are generally expressed as the sum of the exponential and harmonic functions of time (i.e.,  $\bar{h} = \bar{h}_{\text{exp}} + \bar{A}_t \cos(\gamma t - \phi_t)$ ) for transient solutions (e.g., solution 3) and harmonic function (i.e.,  $\bar{h}_s = \bar{A}_s \cos(\gamma t - \phi_s)$ ) for PSS solutions (e.g., solution 6). The latter assuming Eq. (18) without the initial condition produces a certain time shift from the SHM predicted by the  $\bar{h}_{\text{SHM}}$ . The phase  $\phi_s$  should be replaced by  $\phi_t$  so that  $\bar{h}_s$  and  $\bar{h}_{\text{SHM}}$  are exactly the same.

## References

- Bakhos, T., Cardiff, M., Barrash, W., and Kitanidis, P. K.: Data processing for oscillatory pumping tests, *J. Hydrol.*, 511, 310–319, 2014.
- Black, J. H., and Kipp, K. L.: Determination of hydrogeological parameters using sinusoidal pressure tests - a theoretical appraisal, *Water Resour. Res.*, 17(3), 686–692, 1981.
- Cardiff, M., Bakhos, T., Kitanidis, P. K., and Barrash, W.: Aquifer heterogeneity characterization with oscillatory pumping: Sensitivity analysis and imaging potential, *Water Resour. Res.*, 49(9), 5395–5410, 2013.
- Cardiff, M. and Barrash, W.: 3-D transient hydraulic tomography in unconfined aquifers with fast drainage response, *Water Resour. Res.*, 47: W12518, 2011.
- Cardiff, M. and Barrash, W.: Analytical and semi - analytical tools for the design of oscillatory pumping tests, *Ground Water*, 53(6), 896–907, 2014.
- Cartwright, N., Nielsen, P., and Dunn, S.: Water table waves in an unconfined aquifer: Experiments and modeling, *Water Resour. Res.*, 39(12), 1330, 2003.
- Cartwright, N., Nielsen, P., and Perrochet, P.: Influence of capillarity on a simple harmonic oscillating water table: Sand column experiments and modeling, *Water Resour. Res.*, 41(8), W08416, 2005.

443 Christensen, N. K., Ferre, T. P. A., Fiandaca, G., and Christensen, S.: Voxel inversion of  
 444 airborne electromagnetic data for improved groundwater model construction and prediction  
 445 accuracy, *Hydrol. Earth Syst. Sci.*, 21, 1321–1337, 2017.

446 Dagan, G. and Rabinovich, A.: Oscillatory pumping wells in phreatic, compressible, and  
 447 homogeneous aquifers, *Water Resour. Res.*, 50(8), 7058–7066, 2014.

448 Fokker, P. A., Salina Borello, E., Serazio, C., and Verga, F.: Estimating reservoir  
 449 heterogeneities from pulse testing, *J. Petrol. Sci. Eng.*, 86–87, 15–26, 2012.

450 Fokker, P. A., Renner, J., and Verga, F.: Numerical modeling of periodic pumping tests in  
 451 wells penetrating a heterogeneous aquifer, *Am. J. Environ. Sci.*, 9(1), 1–13, 2013.

452 Freeze, R. A. and Cherry, J. A.: *Groundwater*, Prentice-Hall, New Jersey, 1979, 604 pp.

453 Kuo, C.: Determination of reservoir properties from sinusoidal and multirate flow tests in one  
 454 or more wells, *SPE J.*, 12(6), 499–507, 1972.

455 Latinopoulos, P.: Analytical solutions for periodic well recharge in rectangular aquifers with  
 456 3rd-kind boundary-conditions, *J. Hydrol.*, 77(1–4), 293–306, 1985.

457 Liang, X., Zhan, H., Zhang, Y.-K., and Liu, J.: On the coupled unsaturated-saturated flow  
 458 process induced by vertical, horizontal, and slant wells in unconfined aquifers, *Hydrol. Earth*  
 459 *Syst. Sci.*, 21, 1251–1262, 2017.

460 [Liang, X., Zhan, H., Zhang, Y.-K., Liu, J.: Underdamped slug tests with unsaturated - saturated](#)  
 461 [flows by considering effects of wellbore skins, \*Hydrol. Process.\*, 32, 968 – 980, 2018.](#)

462 [Lin, Y.-C., Yeh, H.-D.: A lagging model for describing drawdown induced by a constant-rate](#)  
 463 [pumping in a leaky confined aquifer, \*Water Resour. Res.\*, 53, 8500 – 8511, 2017.](#)

464 Liou, T. S., and Yeh, H. D.: Conditional expectation for evaluation of risk groundwater flow  
 465 and solute transport: one-dimensional analysis, *J. Hydrol.*, 199, 378–402, 1997.

466 Maineult, A., Strobach, E., and Renner, J.: Self-potential signals induced by periodic pumping  
 467 tests, *J. Geophys. Res: Sol. Earth*, 113(B1), B01203, 2008.

468 Moench, A. F.: Combining the Neuman and Boulton models for flow to a well in an unconfined

469 aquifer, *Ground Water*, 33(3), 378–384, 1995.

470 Muthuwatta, L., Amarasinghe, U. A., Sood, A., and Surinaidu, L.: Reviving the “Ganges Water  
 471 Machine”: where and how much?, *Hydrol. Earth Syst. Sci.*, 21, 2545–2557, 2017.

472 Neuman, S.P.: Theory of flow in unconfined aquifers considering delayed response of the water  
 473 table, *Water Resour. Res.*, 8(4), 1031–1045, 1972.

474 [Povstenko, Y.: Linear fractional diffusion-wave equation for scientists and engineers. New  
 475 York, Birkhäuser, 2015.](#)

476 Rabinovich, A., Barrash, W., Cardiff, M., Hochstetler, D., Bakhos, T., Dagan, G., and Kitanidis,  
 477 P. K.: Frequency dependent hydraulic properties estimated from oscillatory pumping tests  
 478 in an unconfined aquifer, *J. Hydrol.*, 531, 2–16, 2015.

479 Rasmussen, T. C., Haborak, K. G., and Young, M. H.: Estimating aquifer hydraulic properties  
 480 using sinusoidal pumping at the Savannah River site, South Carolina, USA, *Hydrogeol. J.*,  
 481 11(4), 466–482, 2003.

482 Spane, F. A. and Mackley, R. D.: Removal of river-stage fluctuations from well response using  
 483 multiple regression, *Ground Water*, 49(6), 794–807, 2011.

484 Vine, N. L., Butler, A., McIntyre, N., and Jackson, C.: Diagnosing hydrological limitations of  
 485 a land surface model: application of JULES to a deep-groundwater chalk basin, *Hydrol.  
 486 Earth Syst. Sci.*, 20, 143–159, 2016.

487 Watlet, A., Kaufmann, O., Triantafyllou, A., Poulain, A., Chambers, J. E., Meldrum, P. I.,  
 488 Wilkinson, P. B., Hallet, V., Quinif, Y., Ruymbeke, M. V., and Camp, M. V.: Imageing  
 489 groundwater infiltration dynamics in the karst vadose zone with long-term ERT monitoring,  
 490 *Hydrol. Earth Syst. Sci.*, 22, 1563–1592, 2018.

491 Wolfram, S.: *Mathematica*, Version 2.0. Wolfram Research, Inc., Champaign, IL, 1991.

492 Yeh, H. D.: Theis' solution by nonlinear least - squares and finite - difference Newton's  
 493 Method, *Ground Water*, 25(6), 710–715, 1987.

494 Yeh, T. C. J. and Liu, S. Y.: Hydraulic tomography: Development of a new aquifer test method,

495 Water Resour. Res., 36(8), 2095–2105, 2000.

496 Zhou, Y. Q., Lim, D., Cupola, F., and Cardiff, M.: Aquifer imaging with pressure waves  
497 evaluation of low-impact characterization through sandbox experiments, Water Resour. Res.,  
498 52(3), 2141–2156, 2016.

#### 499 **Acknowledgments**

500 Research leading to this paper has been partially supported by the grants from the Fundamental  
501 Research Funds for the Central Universities (2018B00114), the National Natural Science  
502 Foundation of China (51809080, 41561134016 and 51421006) and the Taiwan Ministry of  
503 Science and Technology under the contract numbers MOST 107-2221-E-009-019-MY3. The  
504 authors are grateful to Prof. T. C. Rasmussen for kindly providing the OPT data obtained from  
505 the Savannah River site.

506

**Table 1.** The present solution and its special cases

| Well screen | Transient flow                 |                           | Pseudo-steady state flow       |                           |
|-------------|--------------------------------|---------------------------|--------------------------------|---------------------------|
|             | Unconfined aquifer             | Confined aquifer          | Unconfined aquifer             | Confined aquifer          |
| Partial     | Solutions 1 and 2              | Solution 3                | Solutions 4 and 5              | Solution 6                |
| Full        | Solutions 1 and 2 <sup>a</sup> | Solution 3 <sup>a,b</sup> | Solutions 4 and 5 <sup>a</sup> | Solution 6 <sup>a,b</sup> |

508 Solution 1 consists of Eqs. (15a) – (15k) with the roots of Eq. (16) and  $c_0 = a_1 p_0 / (p_0 + a_2)$  for DGD.

509 Solution 2 is the same as solution 1 but has  $c_0 = a p_0$  for IGD.

510 Solution 3 equals solution 1 with Eqs. (17a) – (17d) and  $\beta_n = 0, \pi, 2\pi, \dots, n\pi$ .

511 Solution 4 is the component  $\bar{h}_{\text{SHM}}$  of solution 1 for DGD.

512 Solution 5 consists of Eqs. (24a) – (24m) for IGD.

513 Solution 6 consists of Eqs. (24a) – (24e) with  $\bar{H}(\bar{r}, \bar{z})$  defined by Eq. (25).

514 <sup>a</sup>  $\bar{z}_u = 1$  and  $\bar{z}_l = 0$  for fully screened well

515 <sup>b</sup> The solution is independent of elevation.

516

**Table 2.** Hydraulic parameters estimated by the present solution for OPT data from the Savannah River site

| Observation well               | Present solution        | $T$ (m <sup>2</sup> /s) | $S$                   | $K_z$ (m/s)           | $S_y$                 | $\varepsilon$ (s <sup>-1</sup> ) | SEE   | ME                     |
|--------------------------------|-------------------------|-------------------------|-----------------------|-----------------------|-----------------------|----------------------------------|-------|------------------------|
| <i>Surficial Aquifer</i>       |                         |                         |                       |                       |                       |                                  |       |                        |
| 101D                           | Solution 3 <sup>a</sup> | $9.27 \times 10^{-4}$   | $2.44 \times 10^{-3}$ | -                     | -                     | -                                | 0.018 | $-5.56 \times 10^{-3}$ |
|                                | Solution 6 <sup>b</sup> | $9.18 \times 10^{-4}$   | $2.33 \times 10^{-3}$ | -                     | -                     | -                                | 0.018 | $-2.20 \times 10^{-4}$ |
|                                | Solution 4 <sup>c</sup> | $4.61 \times 10^{-4}$   | $3.95 \times 10^{-3}$ | $7.38 \times 10^{-6}$ | $2.23 \times 10^{-3}$ | $1.06 \times 10^{-2}$            | 0.018 | $-2.20 \times 10^{-4}$ |
|                                | Solution 5 <sup>c</sup> | $5.25 \times 10^{-4}$   | $1.09 \times 10^{-3}$ | $2.61 \times 10^{-5}$ | $5.49 \times 10^{-3}$ | -                                | 0.019 | $-2.30 \times 10^{-4}$ |
| 102D                           | Solution 3 <sup>a</sup> | $9.13 \times 10^{-4}$   | $1.76 \times 10^{-3}$ | -                     | -                     | -                                | 0.010 | $-4.38 \times 10^{-3}$ |
|                                | Solution 6 <sup>b</sup> | $9.17 \times 10^{-4}$   | $1.67 \times 10^{-3}$ | -                     | -                     | -                                | 0.011 | $9.57 \times 10^{-4}$  |
|                                | Solution 4 <sup>c</sup> | $9.57 \times 10^{-5}$   | $7.85 \times 10^{-4}$ | $3.68 \times 10^{-6}$ | $4.95 \times 10^{-3}$ | $2.38 \times 10^{-3}$            | 0.011 | $9.57 \times 10^{-4}$  |
|                                | Solution 5 <sup>c</sup> | $9.49 \times 10^{-5}$   | $3.25 \times 10^{-4}$ | $4.67 \times 10^{-6}$ | $4.68 \times 10^{-3}$ | -                                | 0.011 | $9.50 \times 10^{-4}$  |
| <i>Barnwell-McBean Aquifer</i> |                         |                         |                       |                       |                       |                                  |       |                        |
| 201C                           | Solution 3 <sup>a</sup> | $5.86 \times 10^{-5}$   | $7.07 \times 10^{-4}$ | -                     | -                     | -                                | 0.232 | 0.046                  |
|                                | Solution 6 <sup>b</sup> | $6.03 \times 10^{-5}$   | $6.54 \times 10^{-4}$ | -                     | -                     | -                                | 0.363 | 0.281                  |

518 <sup>a</sup> transient confined flow519 <sup>b</sup> PSS confined flow520 <sup>c</sup> PSS unconfined flow



521

## Figures

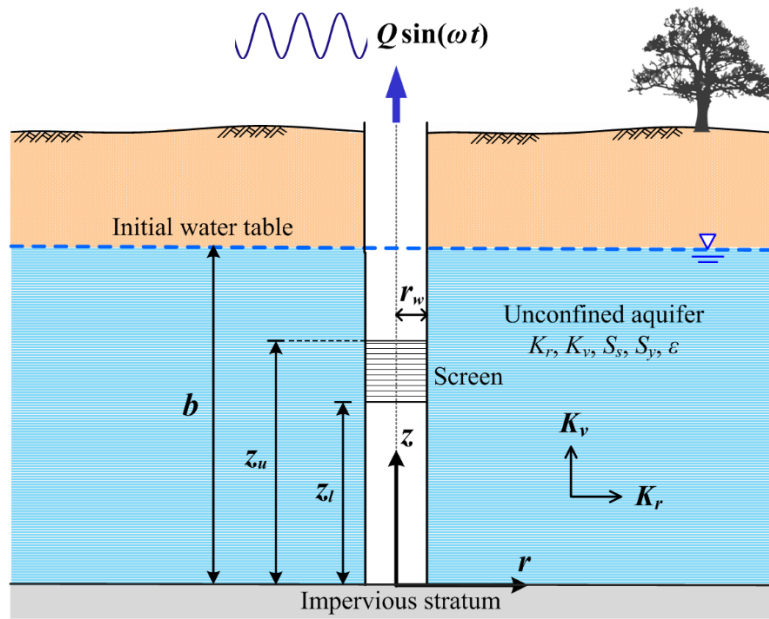

522

523 **Figure 1.** Schematic diagram for oscillatory pumping test at a partially screened well of finite  
 524 radius in an unconfined aquifer.

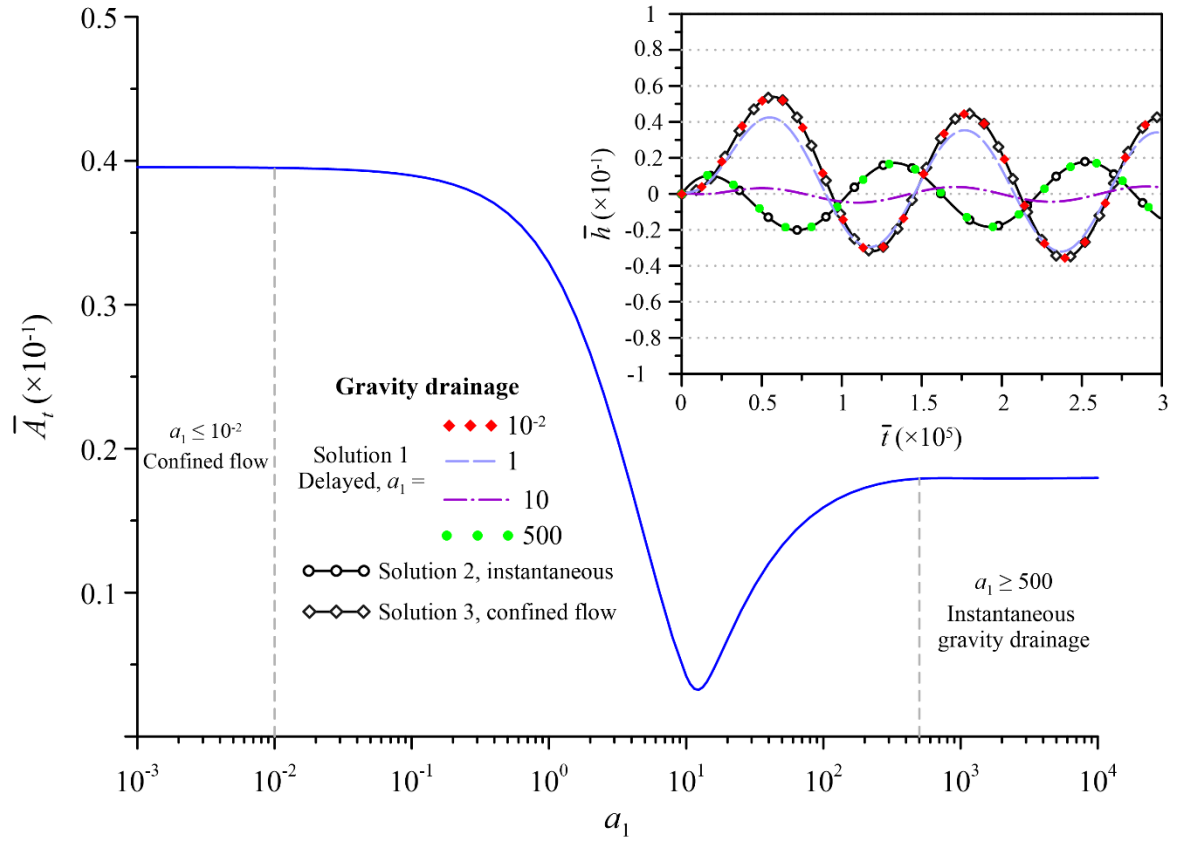

**Figure 2.** Influence of delayed gravity drainage on the dimensionless amplitude  $\bar{A}_t$  and transient head  $\bar{h}$  at  $\bar{r} = 1$ ,  $\bar{z} = 1$  predicted by solution 1 for different magnitudes of  $a_1$  related to the influence.

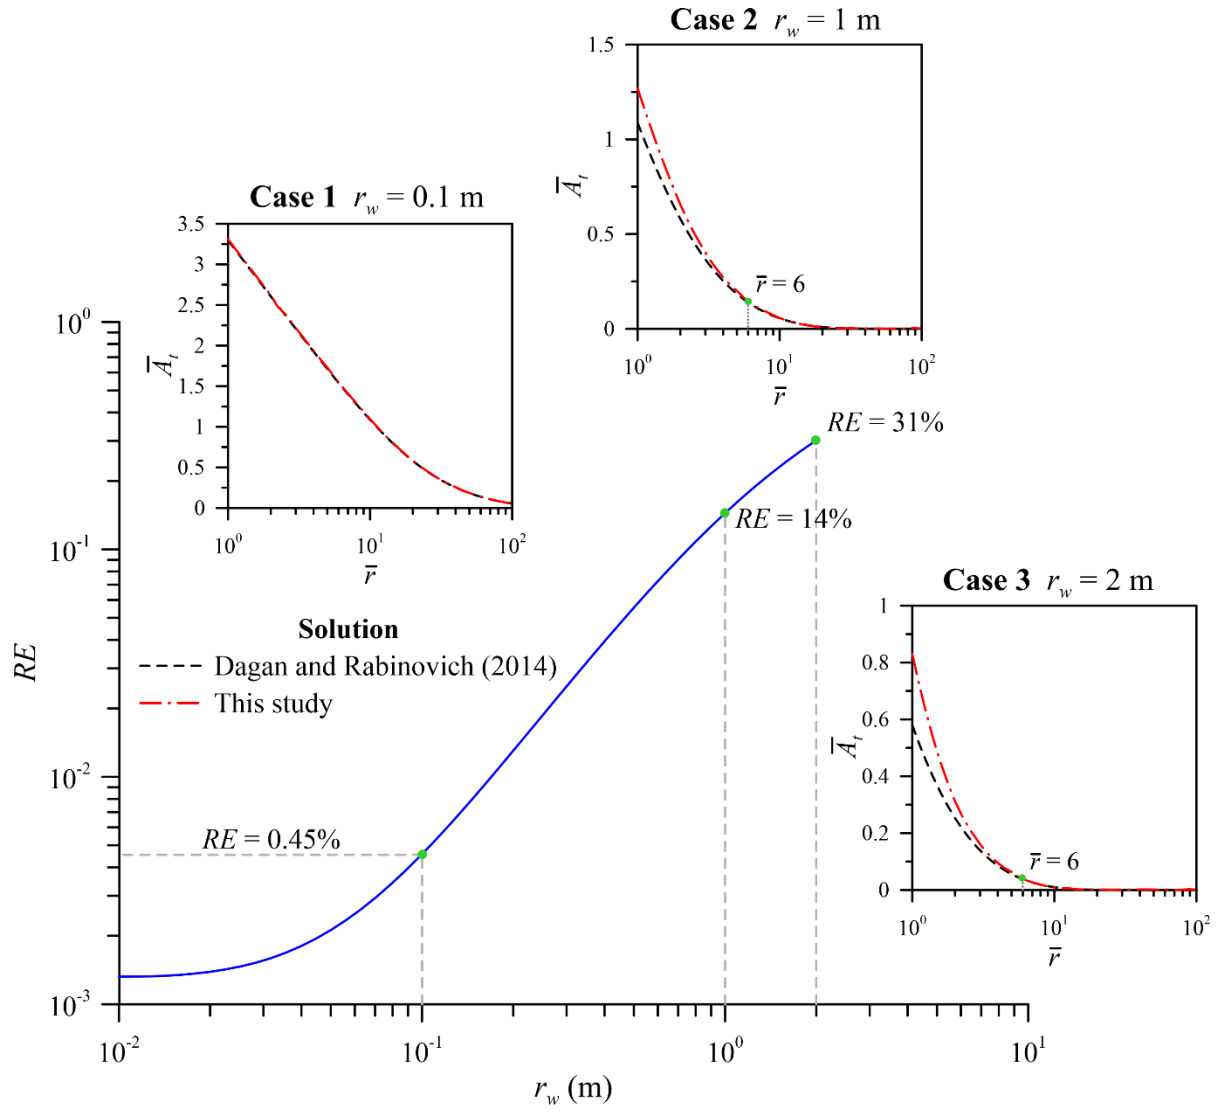

**Figure 3.** Relative error (RE) on the dimensionless amplitudes  $\bar{A}_t$  at the rim of the pumping well (i.e.,  $r = r_w$ ) predicted by the Dagan and Rabinovich (2014) solution and the IGD solution 2. The well radius is assumed infinitesimal in the Dagan and Rabinovich (2014) solution and finite in our solution.

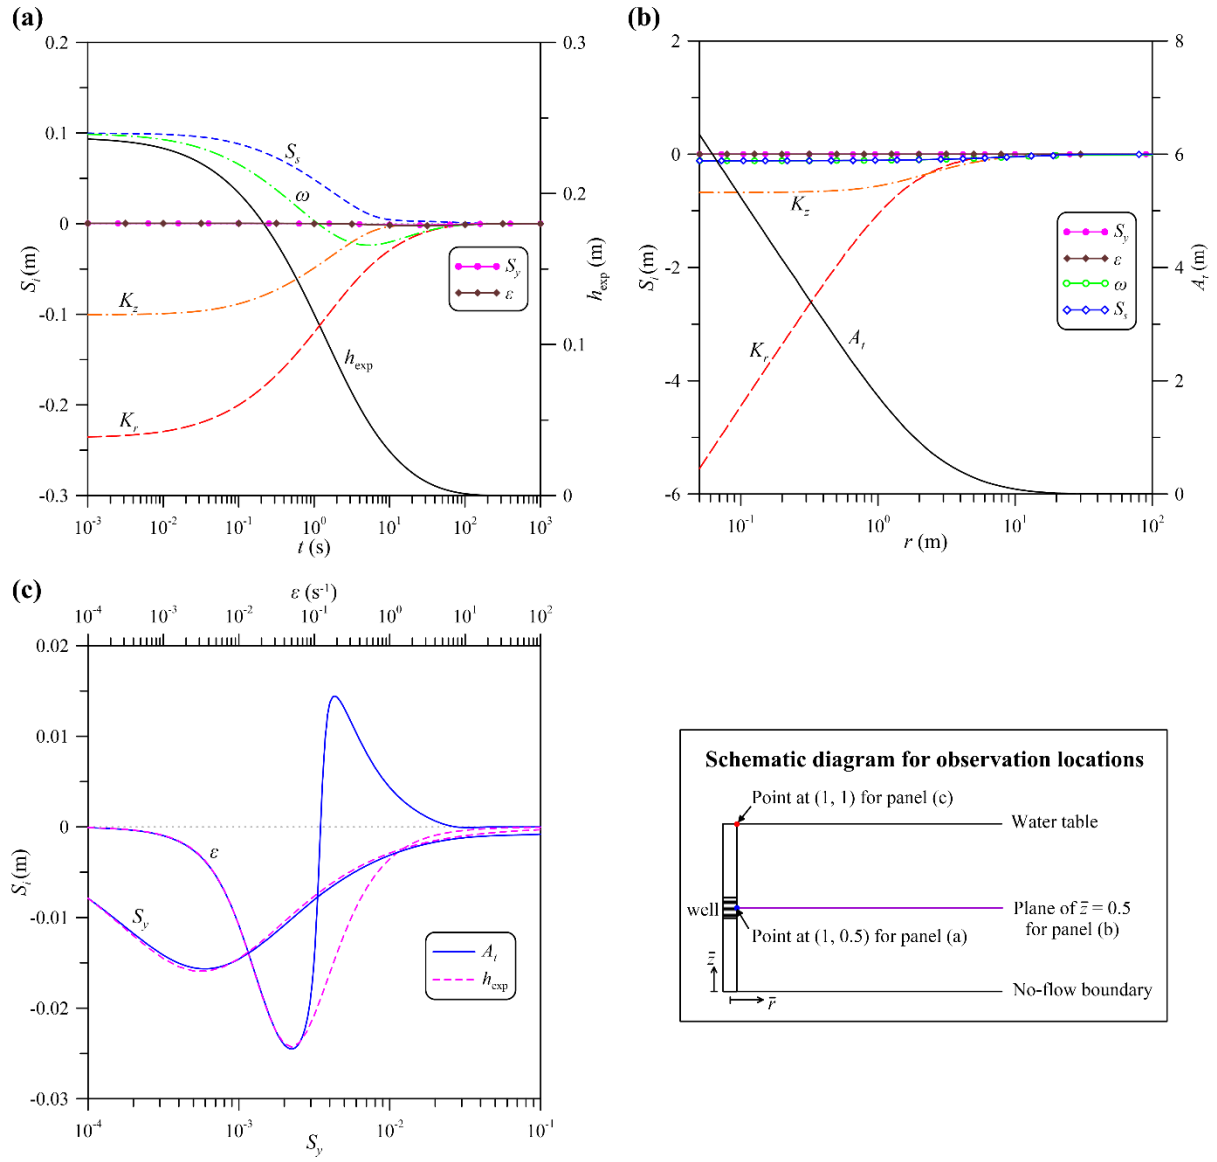

**Figure 4.** The normalized sensitivity coefficient  $S_i$  associated with (a) the exponential component  $h_{exp}$  of solution 1 and (b) the SHM amplitude  $A_t$  for parameters  $K_r$ ,  $K_z$ ,  $S_s$ ,  $S_y$ ,  $\omega$  and  $\epsilon$ . The observation locations for panels (a) and (b) are under water table (i.e.,  $\bar{z} = 0.5$ ). Panel (c) displays the curves of  $S_i$  of  $h_{exp}$  and  $A_t$  at water table (i.e.,  $\bar{z} = 1$ ) versus  $S_y$  and  $\epsilon$ .

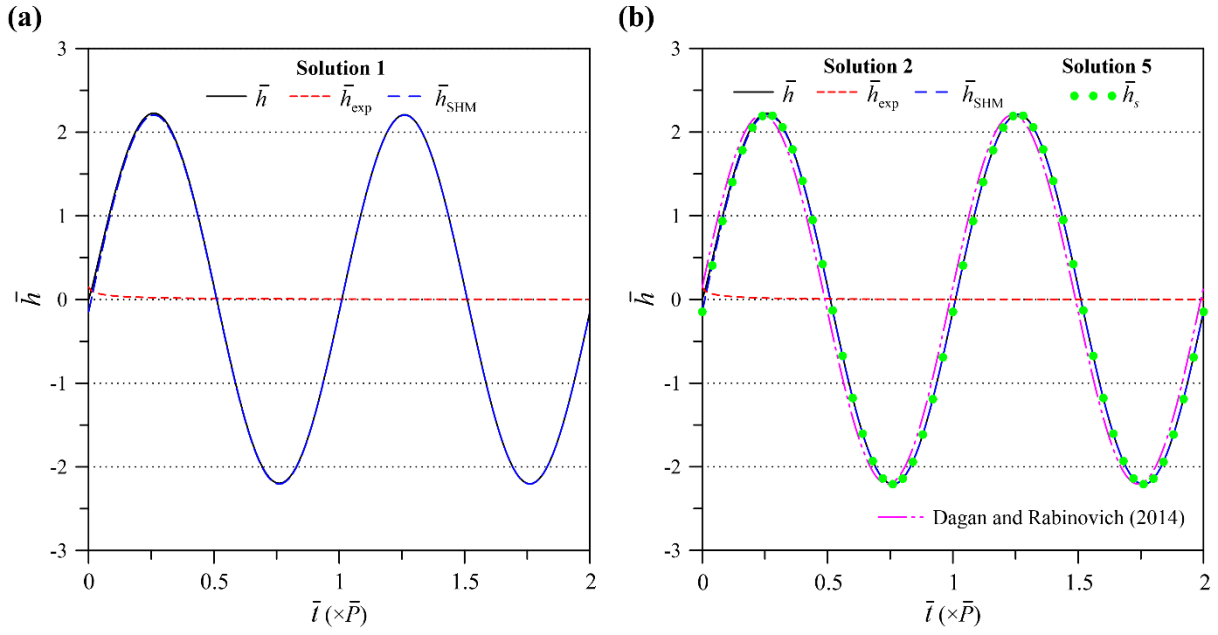

**Figure 5.** Heads fluctuations at  $\bar{r} = 6$  predicted by (a) DGD solution 1 and (b) IGD solution 2. Solutions 1 and 2 are expressed as  $\bar{h} = \bar{h}_{\text{exp}} + \bar{h}_{\text{SHM}}$  for transient flow. IGD solution 5 expressed as  $\bar{h}_s = \bar{A}_s \cos(\gamma t - \phi_s)$  accounts for PSS flow.

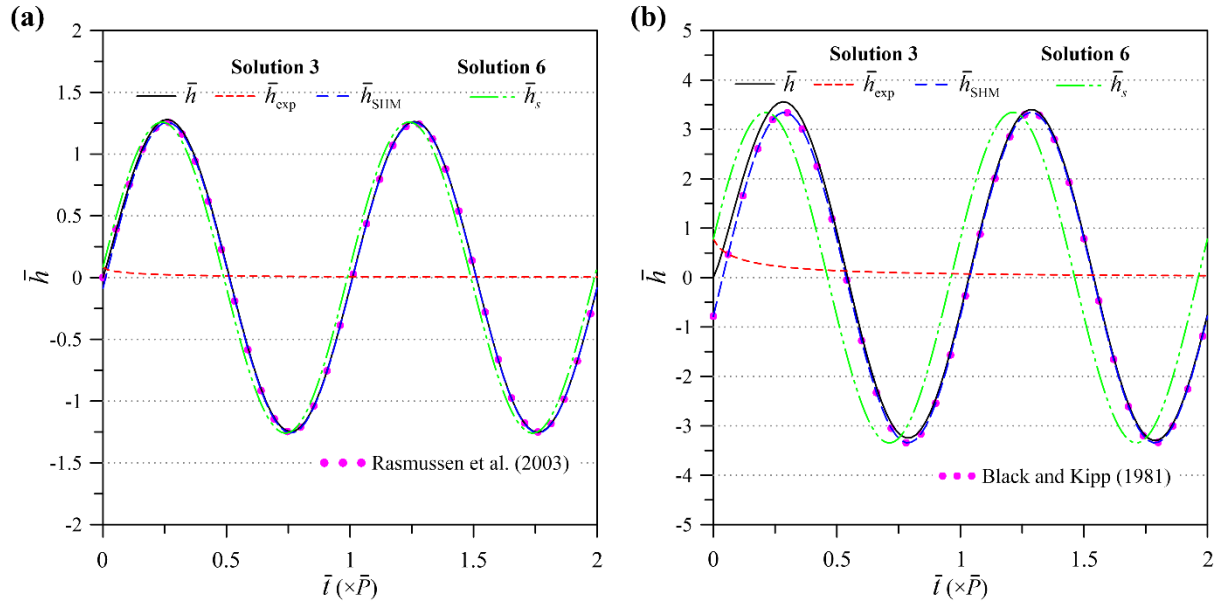

**Figure 6.** Heads fluctuations at  $\bar{r} = 6$  predicted by solutions 3 and 6 for (a) partially-screened pumping well and (b) fully-screened pumping well. Solution 3 is expressed as  $\bar{h} = \bar{h}_{\text{exp}} + \bar{h}_{\text{SHM}}$  for transient flow. Solution 6 expressed as  $\bar{h}_s = \bar{A}_s \cos(\gamma t - \phi_s)$  accounts for PSS flow.

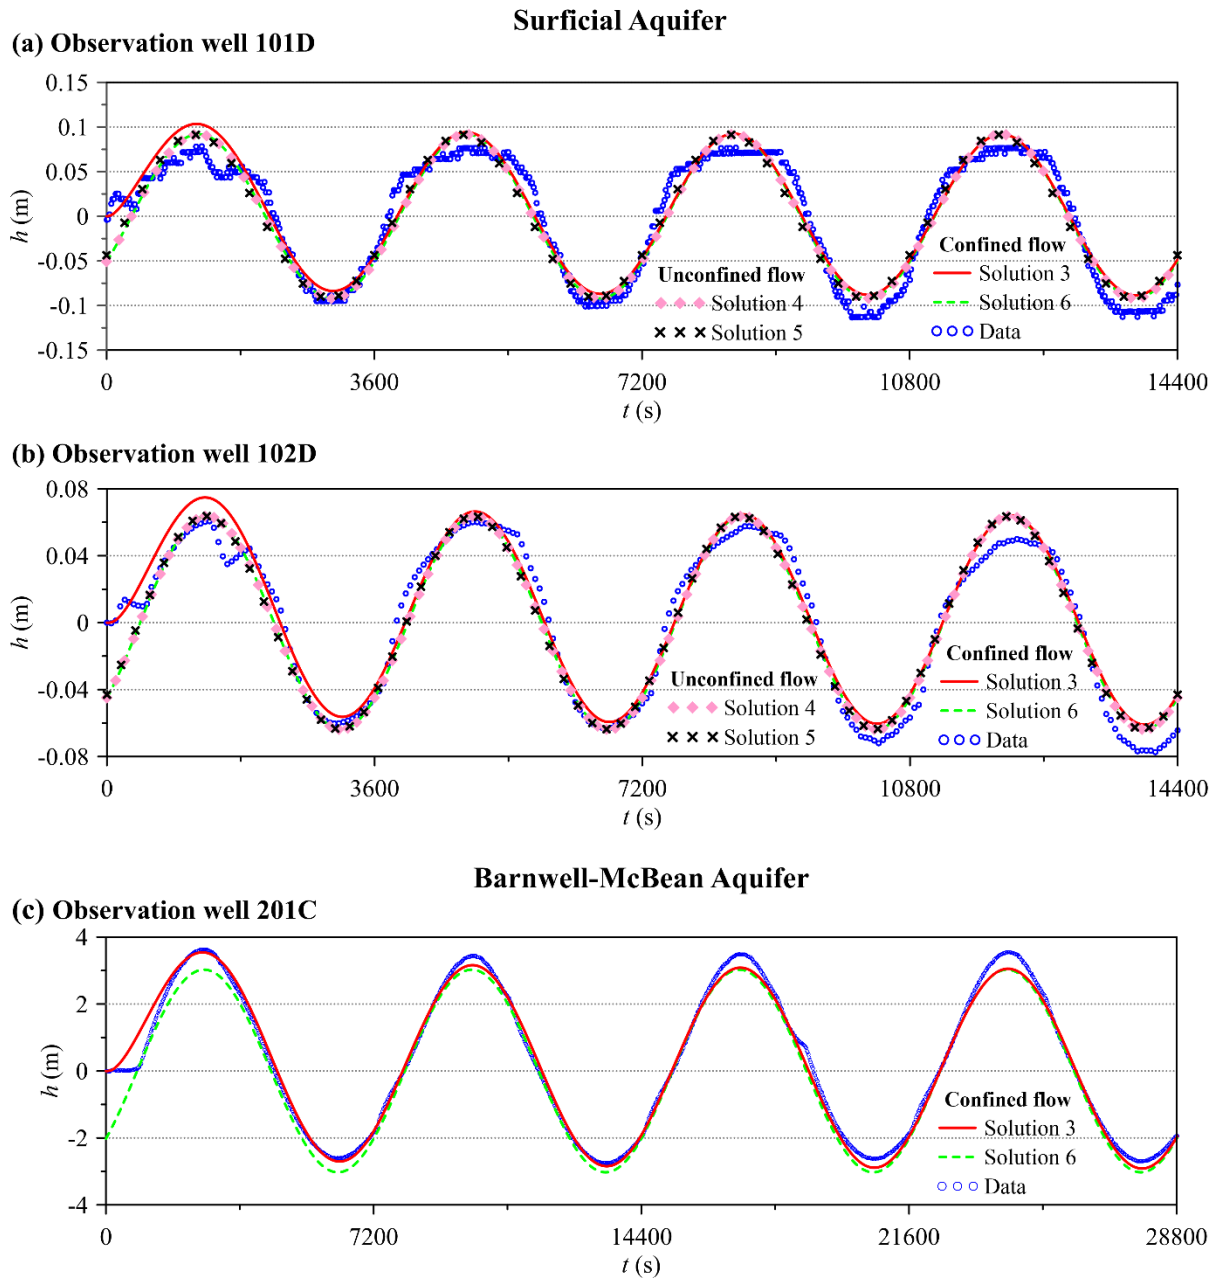

**Figure 7.** Comparison of field observation data with head fluctuations predicted by the present solution. Solutions 3 and 6 represent transient and PSS confined flows, respectively. PSS solutions 4 and 5 stand for DGD and IGD conditions, respectively.
